# Supplementary material for: Utilization of Encroacher Bush Biomass for Ganoderma Mushroom Cultivation in Otjozondjupa Region, Namibia
Source: Research Square preprint supplement (doi:10.21203/rs.3.rs-7782157/v1), 2025-10-24
Supplement: Supplementary file 1 [file b68fc00ba30dd03f3f422765.docx]

| Welcome to the world of ***Ganoderma*** cultivation! whether you're a seasoned mushroom cultivator or a curious enthusiast, this brochure will guide you through the outlined process of growing ***Ganoderma lucidum*** mushrooms.  **WHY *Ganoderma*?**  ***Ganoderma, also known as Lingzhi or Reishi, has been used for centuries in traditional medicine for its outstanding health benefits (Sheikisha et al., 2022). From immune support to anti-inflammatory, antioxidant properties, treating of metabolic disorders such as diabetes and obesity (Kadhila, 2012) Ganoderma offers a countless of potential wellness advantages.***    **Figure 1**  **Namibian Indigenous Ganoderma mushroom** | **Soaking and draining**  **Figure 2: Cultivation process**  Figure 3 | | 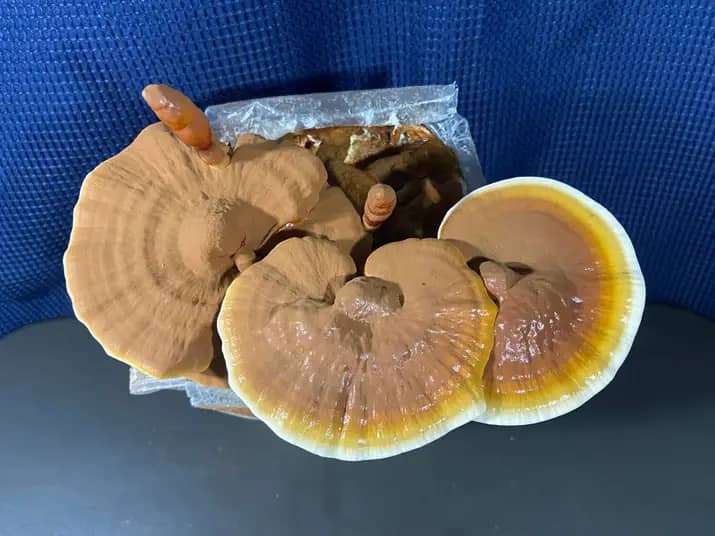  **Figure 4: Ganoderma lucidum** | | --- | | ***CULTIVATION OF GANODERMA LUCIDUM***  **-Utilization of bush encroachers for *Ganoderma* mushroom production at Okondjatu.**  Subtitle | |
| --- | --- | --- | --- | --- |
| **Where does one start?**  **1.** **Choosing the Grow room:** Select a room that is well-ventilated with indirect sunlight. *Ganoderma* thrives in a humid environment, factors like temperature and humidity are to be considered.  **2. Selecting Lignocellulosic Substrate:** *Ganoderma* can be cultivated on various substrates, including sawdust, wood chips, or wood logs. Ensure the substrate is and that it is suitable for mushroom cultivation.  **3. Inoculation:** Once you've prepared your substrate, inoculate it with *Ganoderma* spores, cultures, or spawn. This can be done through methods like grain spawn inoculation or sawdust spawn inoculation.  **The Cultivation processes**  **1. Incubate** the substrate in a controlled environment with optimal temperature and humidity for mycelium growth, regularly monitoring for contamination signs and making necessary adjustments.  **2. Colonizing and Fruiting:** The mycelium spreads throughout a substrate, gradually | | colonizing it. Once fully colonized (appearance of full white coverage), it begins fruiting by exposing it to fresh air and slightly lower temperatures, resulting in small, reddish-brown bumps developing into mature *Ganoderma* mushrooms.  **Harvesting and beyond.**   - **Harvesting:** *Ganoderma* mushrooms are harvested when they reach full size and firm texture, using a knife to cut them close to the substrate surface or hands to plug them off the substrate bags. - **Drying:** To preserve them for long-term storage, they should be dried using a dehydrator or sun/air-drying in a well-ventilated area. - **Value addition:** They can be used in various ways, such as teas, tinctures, culinary dishes, and supplements, to enjoy their benefits. | 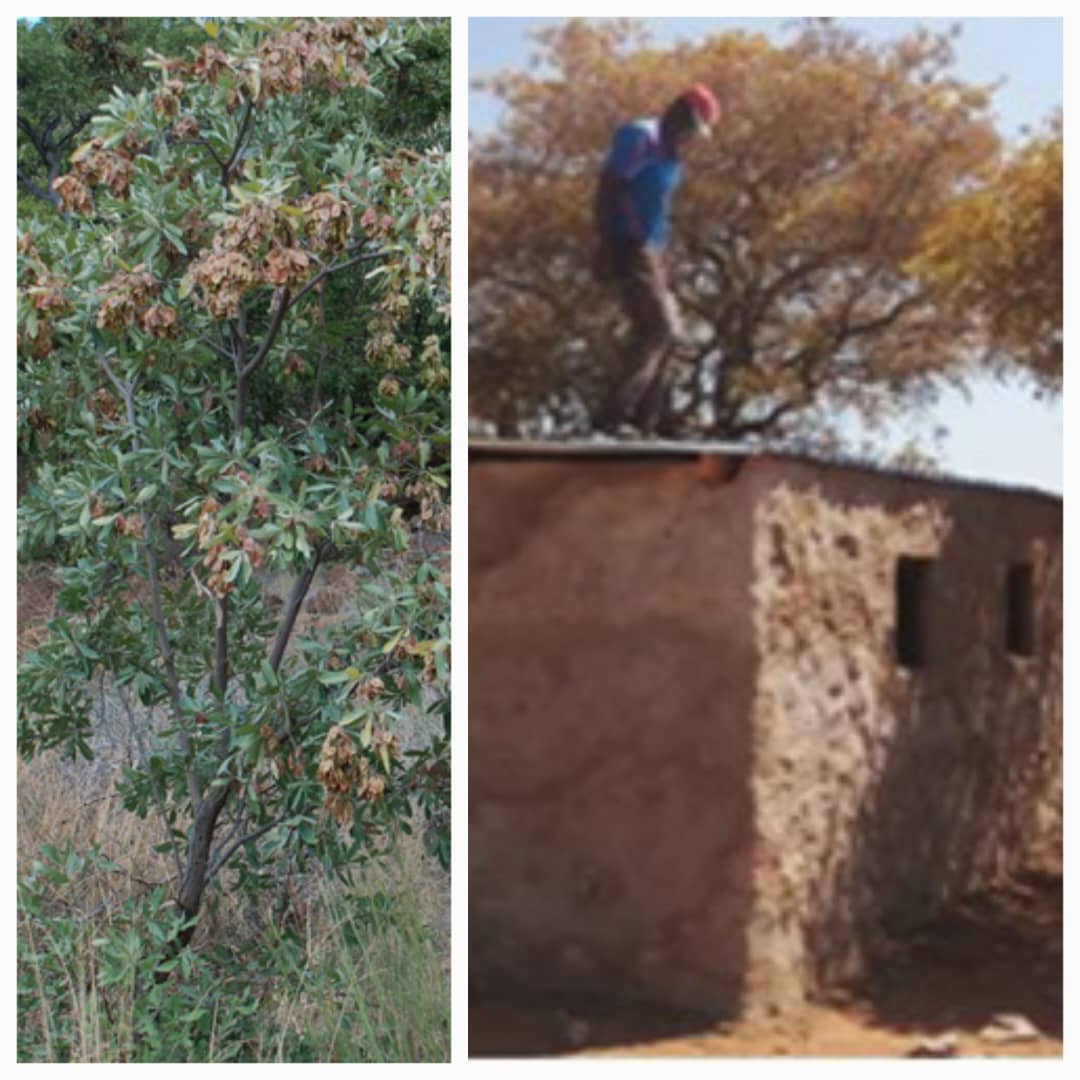  **Figure 5:**  **Encroacher bush (Terminalia sericea) and the mushroom house at Okondjatu**  “Congratulations on your Ganoderma cultivation journey! Approach it with curiosity, patience, and admiration for the natural world. This ancient practice connects humanity to the rich traditions of herbal medicine and sustainable agricultural practices, presenting a rewarding skill for personal well-being or marketable endeavors.” -Hilma Nashandi.  **Facilitators**  **Hilma Nashandi (student)**  **Ms Isabella Ueitele**  **Mr Urban Ujava**  **Project PI: Prof N. P Kadhila**  **Contacts:**  **0813511465/**  **0815571595** |
